- Dinnyes, A., Wallace, G.A. and Rall, W.F. (1995) Effect of genotype on the efficiency of mouse embryo cryopreservation by vitrification or slow freezing methods. *Mol. Reprod. Dev.*, **40**, 429–435.
- Fugger, E.F., Bustillo, M., Katz, L.P. *et al.* (1988) Embryonic development and pregnancy from fresh and cryopreserved sibling pronucleate human zygotes. *Fertil. Steril.*, **50**, 273–278.
- Gardner, D.K., Pawelczynski, M. and Trounson, A.O. (1996) Nutrient uptake and utilization can be used to select viable day 7 bovine blastocysts after cryopreservation. *Mol. Reprod. Dev.*, **44**, 472–475.
- Ishida, G.M., Saito, H., Ohta, N. *et al.* (1997) The optimal equilibration time for mouse embryos frozen by vitrification with trehalose. *Hum. Reprod.*, **12**, 1259–1262.
- James, D.E., Strube, M. and Mueckler, M. (1989) Molecular cloning and characterization of an insulin-regulatable glucose transporter. *Nature*, **338**, 83–87.
- Kasai, M., Komi, J.H., Takakamo, A. *et al.* (1990) A simple method for mouse embryo cryopreservation in a low toxicity vitrification solution, without appreciable loss of viability. *J. Reprod. Fertil.*, **89**, 91–97.
- Khurana, N.K. and Wales, R.G. (1987) Effects of oestradiol and progesterone on the metabolism of [U-14C] glucose by mouse morulae and early blastocysts *in vitro*. *J. Reprod. Fertil.*, **79**, 267–273.
- Leese, H.J. and Barton, A.M. (1984) Pyruvate and glucose uptake by mouse ova and preimplantation embryos. *J. Reprod. Fertil.*, **72**, 9–13.
- Levrin, K., Dor, J., Rudak, E. *et al.* (1990) Pregnancy potential of human oocytes — the effect of cryopreservation of human embryos. *Baillières Clin. Obstet. Gynaecol.*, **6**, 1153–1156.
- Miyake, T., Kasai, M., Zhu, S.E. *et al.* (1993) Vitrification of mouse oocytes and embryos at various stages of development in an ethylene glycol-based solution by a simple method. *Theriogenology*, **40**, 121–134.
- Morita, Y., Tsutsumi, O. and Taketani, Y. (1994) *In vitro* treatment of embryos with epidermal growth factor improves viability and increases the implantation rate of blastocysts transferred to recipient mice. *Am. J. Obstet. Gynecol.*, **171**, 406–409.
- Morita, Y., Tsutsumi, O., Hosoya, I. *et al.* (1992) Expression and possible function of glucose transporter protein GLUT1 during preimplantation mouse development from oocytes to blastocysts. *Biochem. Biophys. Res. Commun.*, **188**, 8–15.
- Mukaida, T., Wada, S., Takahashi, K. *et al.* (1998) Vitrification of human embryos based on the assessment of suitable conditions for 8-cell mouse embryos. *Hum. Reprod.*, **13**, 2874–2879.
- Olivennes, F., Schneider, Z., Remy, V. *et al.* (1996) Perinatal outcome and follow-up of 82 children aged 1–9 years old conceived from cryopreserved embryos. *Hum. Reprod.*, **11**, 1565–1568.
- Orci, L., Thorens, B., Ravazzola, M. and Lodish, H.F. (1989) Localization of the pancreatic beta cell glucose transporter to specific plasma membrane domains. *Science*, **245**, 295–297.
- Rall, W.F. and Fahy, G.M. (1985) Ice-free cryopreservation of mouse embryos at –196 degrees C by vitrification. *Nature*, **313**, 573–575.
- Rall, W.F. and Wood, M.J. (1994) High *in vitro* and *in vivo* survival of day 3 mouse embryos vitrified or frozen in a non-toxic solution of glycerol and albumin. *J. Reprod. Fertil.*, **101**, 681–688.
- Rall, W.F., Wood, M.J., Kirby, C. and Whittingham, K.G. (1987) Development of mouse embryos cryopreserved by vitrification. *J. Reprod. Fertil.*, **80**, 499–504.
- Rudolph, A.S. and Crowe, J.H. (1985) Membrane stabilization during freezing: the role of two natural cryoprotectants, Trehalose and Proline. *Cryobiology*, **22**, 367–377.
- Selick, C.E., Hofmann, G.E., Albano, C. *et al.* (1995) Embryo quality and pregnancy potential of fresh compared with frozen embryos—is freezing detrimental to high quality embryos? *Hum. Reprod.*, **10**, 392–395.
- Suenaga, A., Tachi, C., Tojo, H. *et al.* (1996) Quantitative analysis of the spreading of the mouse trophoblast *in vitro*: a model for early invasion. *Placenta*, **17**, 583–590.
- Sussman, A.S. and Lingappa, B.T. (1959) Role of trehalose in ascospores of *Neurospora tetrasperma*. *Nature*, **130**, 1343.
- Tarkowski, A.K. (1966) An air-drying method for chromosome preparations from mouse eggs. *Cytogenetics*, **5**, 394–400.
- Trounson, A. and Mohr, L. (1983) Human pregnancy following cryopreservation, thawing and transfer of an eight-cell embryo. *Nature*, **305**, 707–709.
- Tsutsumi, O., Uechi, H., Sone, H. *et al.* (1998) Presence of dioxins in human follicular fluid: their possible stage-specific action on the development of preimplantation mouse embryos. *Biochem. Biophys. Res. Commun.*, **250**, 498–501.
- Uechi, H., Tsutsumi, O., Morita, Y. and Taketani, Y. (1997) Cryopreservation of mouse embryos affects later embryonic development possibly through reduced expression of the glucose transporter GLUT1. *Mol. Reprod. Dev.*, **48**, 496–500.
- Van den Abbeel, E., Camus, M., Van Waesberghe, L. *et al.* (1997) A randomized comparison of the cryopreservation of one-cell human embryos with a slow controlled-rate cooling procedure or a rapid cooling procedure by direct plunging into liquid nitrogen. *Hum. Reprod.*, **12**, 1554–1560.
- Van der Elst, J., Amerijckx, Y. and Van Steirteghem, A. (1998) Ultra-rapid freezing of mouse oocytes lowers the cell number in the inner cell mass of 5 day old *in-vitro* cultured blastocysts. *Hum. Reprod.*, **13**, 1595–1599.
- Van Steirteghem, A., van den Abbeel, E., Camus, M. and Devroey, P. (1992) Cryopreservation of human embryos. *Baillières Clin. Obstet. Gynaecol.*, **6**, 313–325.
- Van Wagtenonck-De Leeuw, A.M., Den Daas, J.H., Kruij, T.A. and Rall, W.F. (1995) Comparison of the efficacy of conventional slow freezing and rapid cryopreservation methods for bovine embryos. *Cryobiology*, **32**, 157–167.
- Wada, I., Macnamee, M.C., Wick, K. *et al.* (1994) Birth characteristics and perinatal outcome of babies conceived from cryopreserved embryos. *Hum. Reprod.*, **9**, 543–546.
- Whittingham, D.G., Leibo, S.P. and Mazur, P. (1972) Survival of mouse embryos frozen to –196 degrees and –269 degrees C. *Science*, **178**, 411–414.

Received on March 9, 1999; accepted on July 22, 1999
